# Supplementary material for: Quality of Large Language Model Responses to Radiation Oncology Patient Care Questions
Source: PubMed Central journal article supplement (PMC10988356; doi:10.1001/jamanetworkopen.2024.4630), 2024-04-02
Supplement: jamanetwopen-e244630-s001.pdf [file jamanetwopen-e244630-s001.pdf]

## Supplemental Online Content

Yalamanchili A, Sengupta B, Song J, et al. Quality of large language model responses to radiation oncology patient care questions. *JAMA Netw Open*. 2024;7(4):e244630. doi:10.1001/jamanetworkopen.2024.4630

**eFigure 1.** A Complete Ranking of All Treatment Modality-Specific Answers

**eFigure 2.** Likert Scale Comparison of ChatGPT-Generated Responses and Online Resource Expert Answers

**eFigure 3.** Computationally Generated Metrics for ChatGPT Generated Responses in Each Subcategory Within Treatment Modality-Specific Answers

**eFigure 4.** Computationally Generated Metrics for ChatGPT Generated Responses in Each Subcategory Within Treatment Subsite-Specific Answers

This supplemental material has been provided by the authors to give readers additional information about their work.

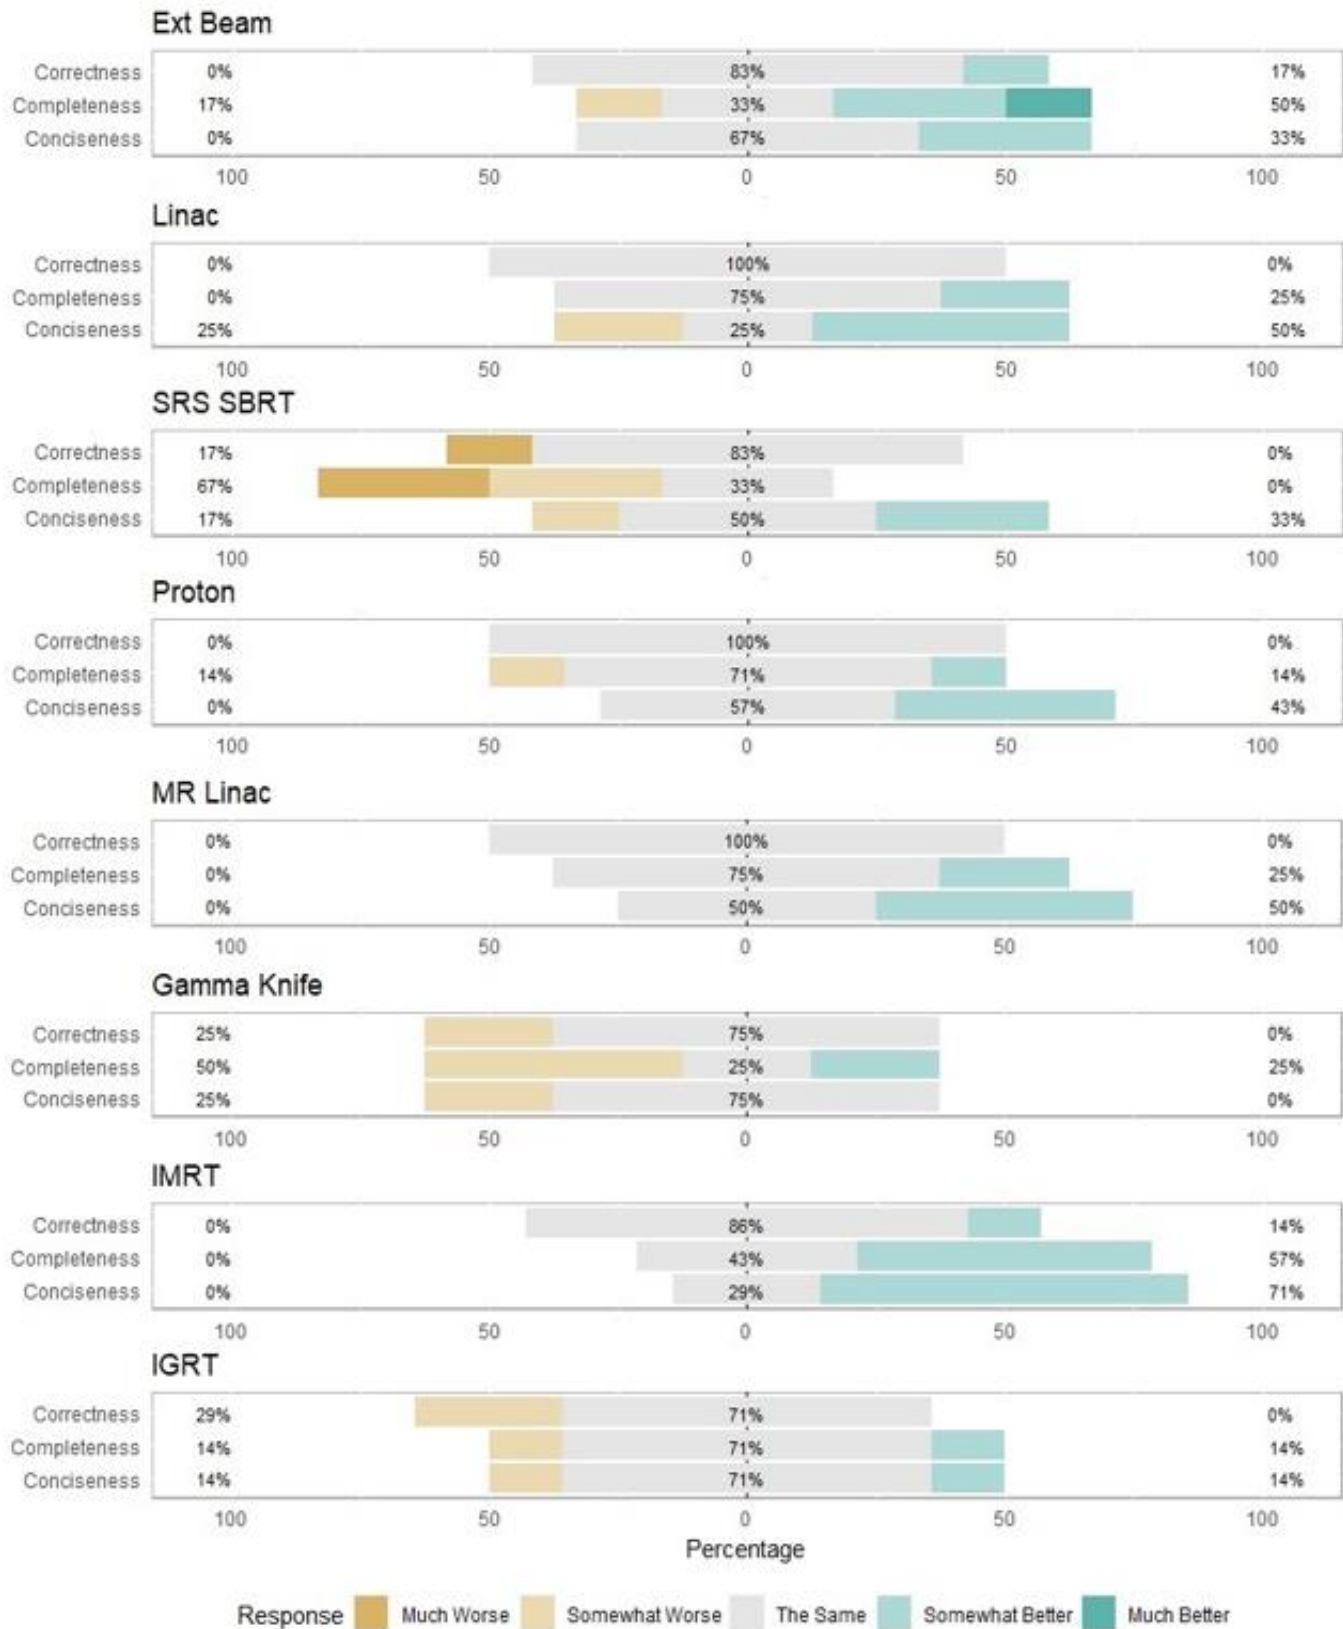

Figure 1: A complete ranking of all treatment modality-specific answers (a continuation of Figure 2).

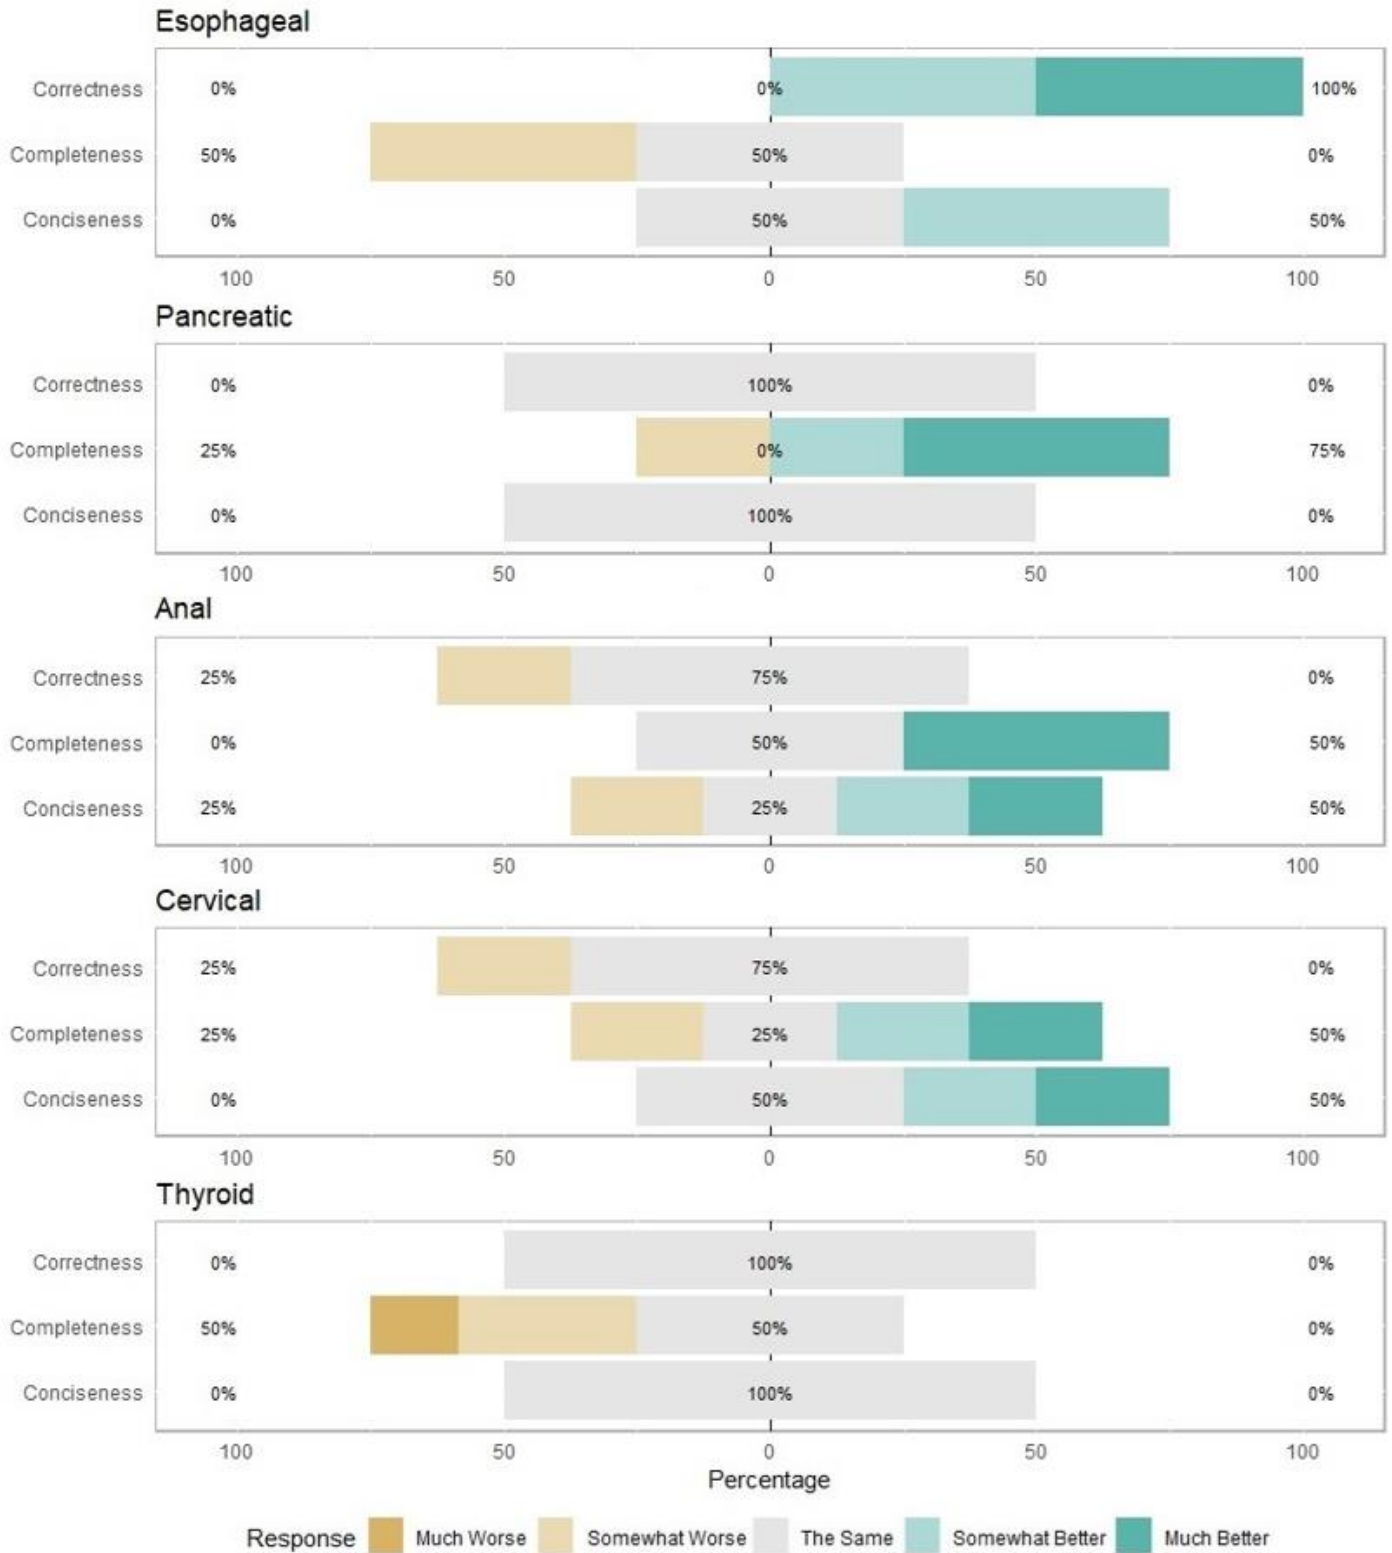

eFigure 2. Continuation of Figure 3 – Likert scale comparison of ChatGPT-generated responses and online resource expert answers. This plot illustrates the relative factual correctness, completeness, and conciseness within each treatment subsite-specific category, covering esophageal, pancreatic, anal, cervical, and thyroid cancers.

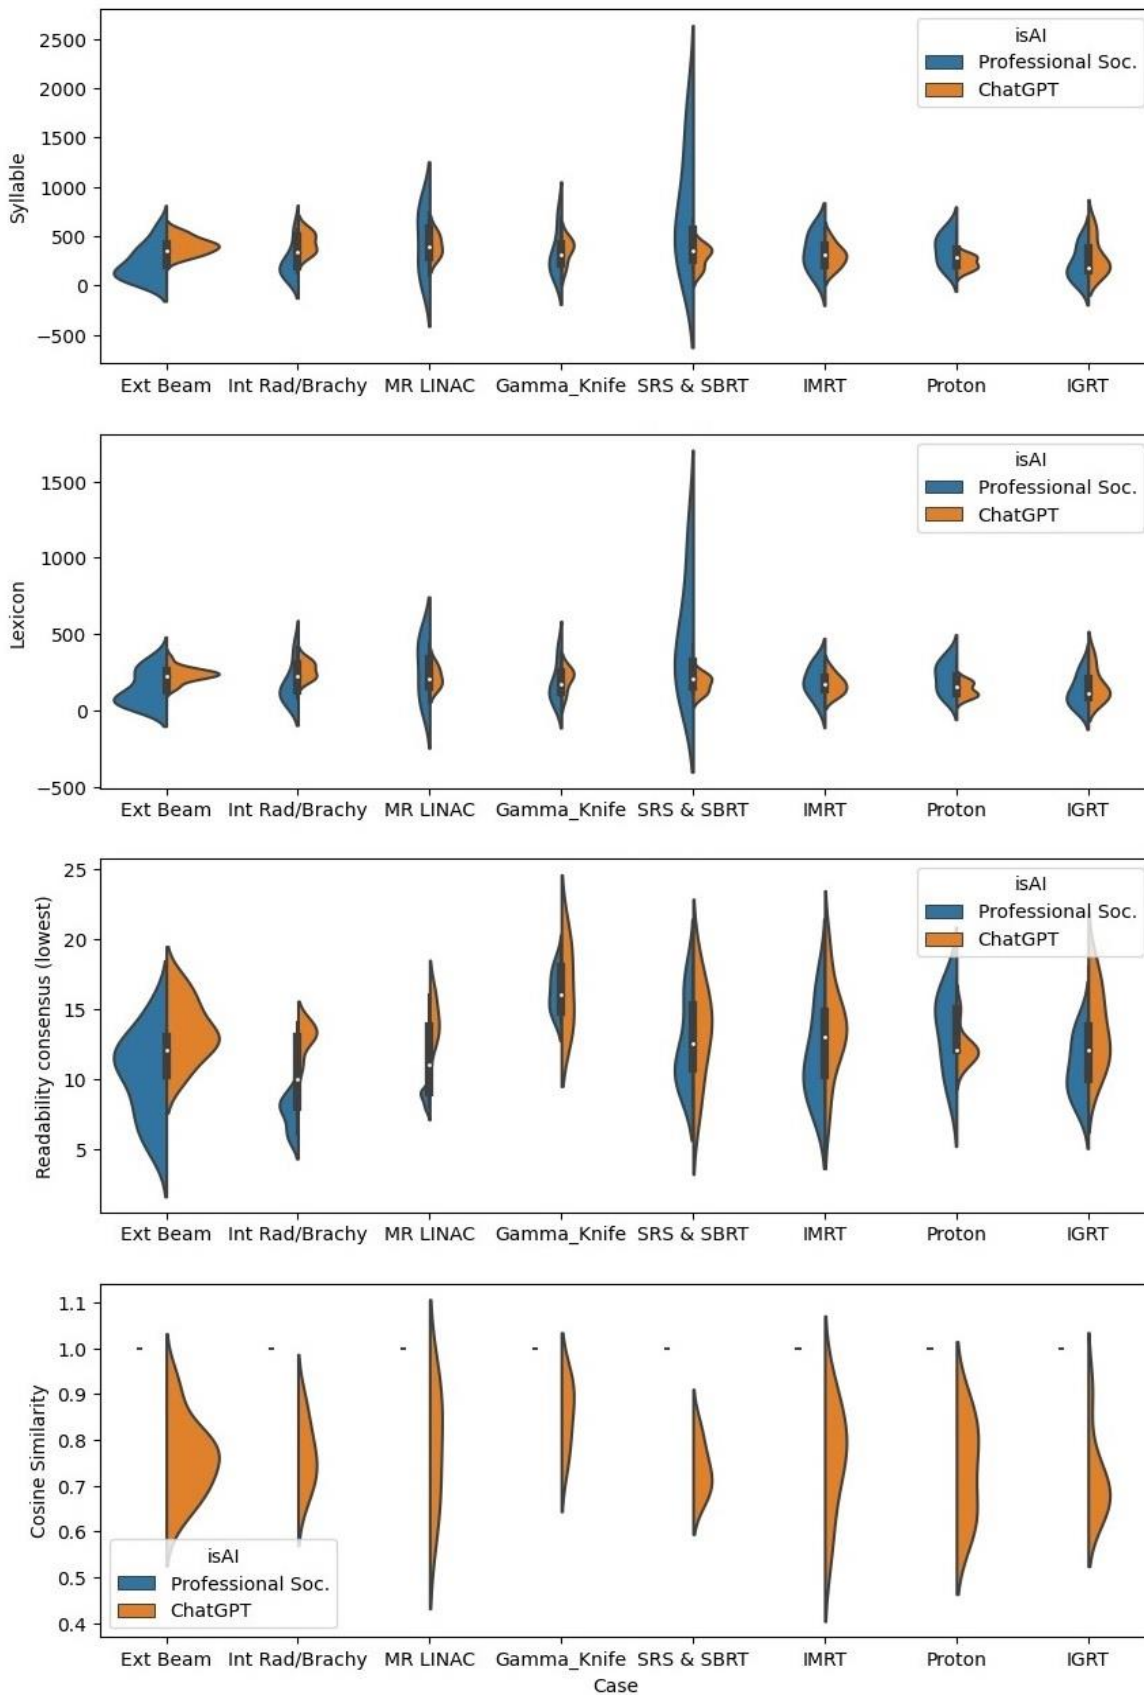

eFigure 3. Computationally generated metrics for ChatGPT generated responses in each subcategory within treatment modality-specific answers.

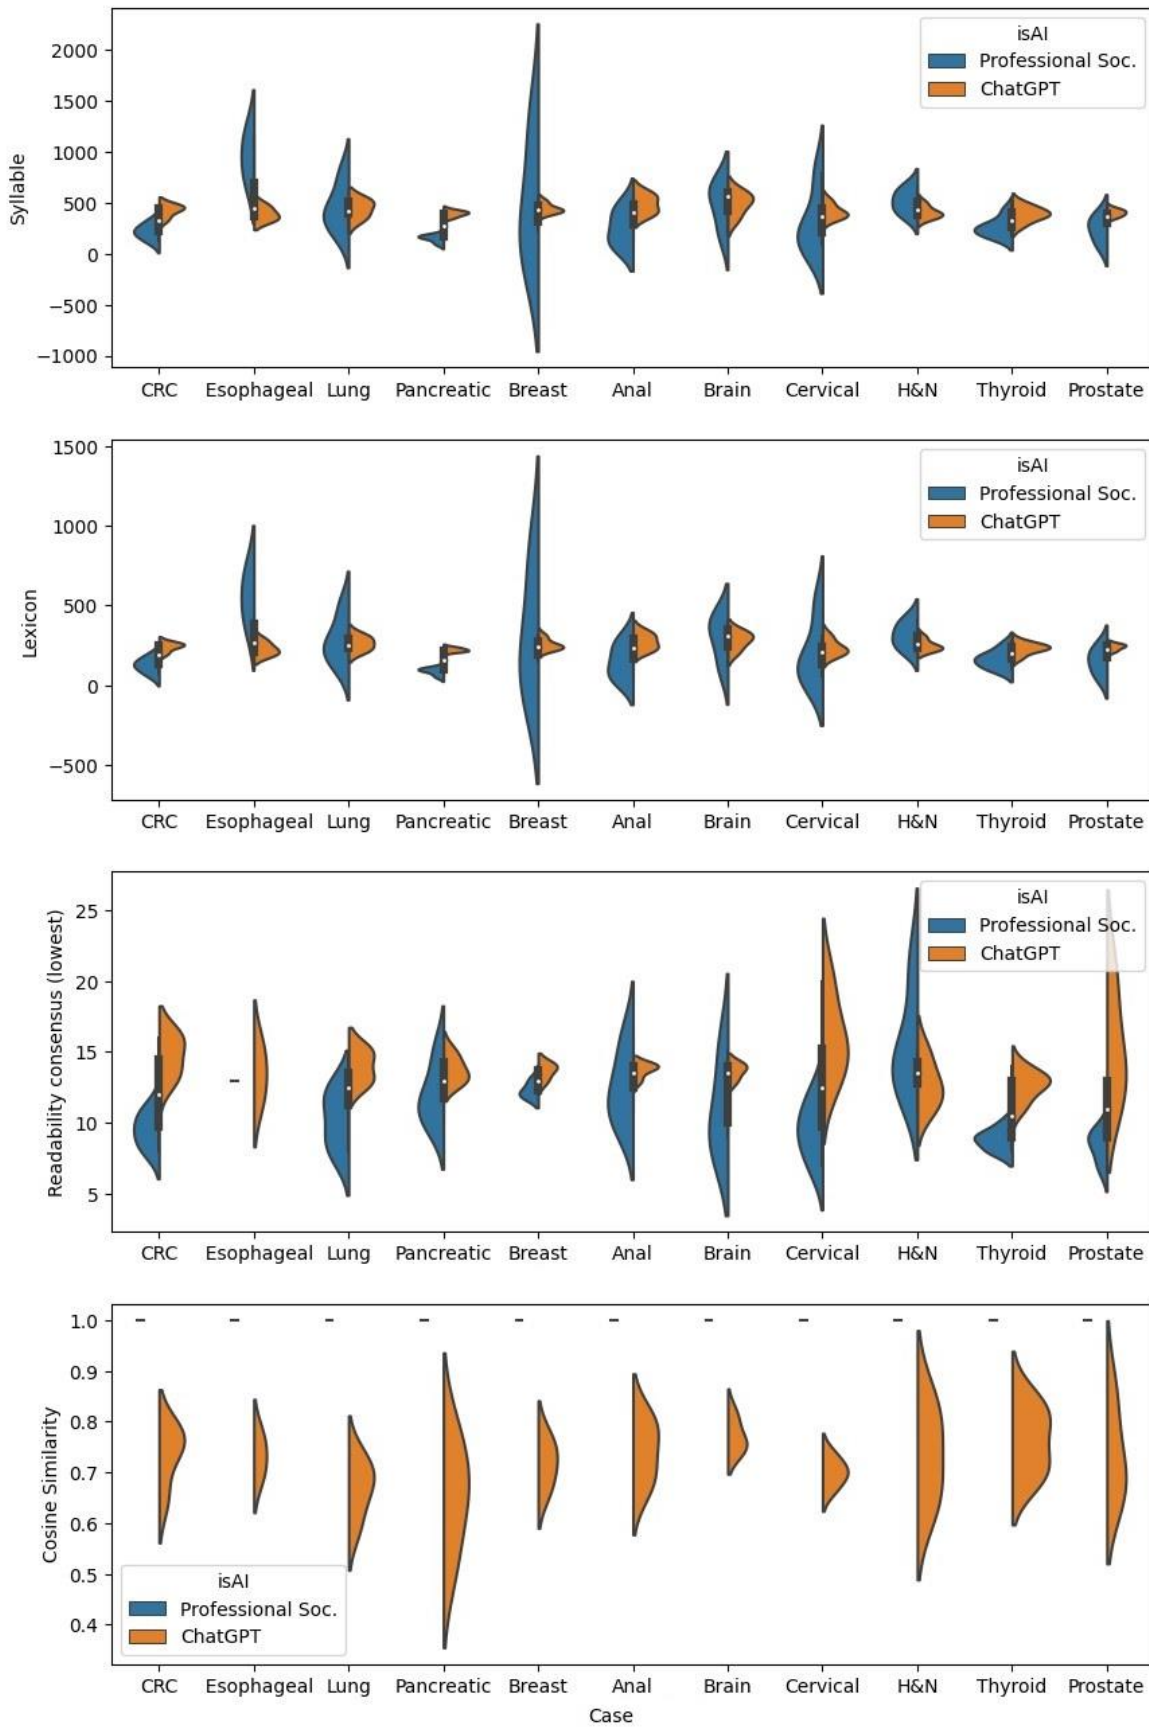

eFigure 4. Computationally generated metrics for ChatGPT generated responses in each subcategory within treatment subsite-specific answers.
