# Supplementary material for: Quality of Large Language Model Responses to Radiation Oncology Patient Care Questions
Source: PubMed Central journal article supplement (PMC10988356; doi:10.1001/jamanetworkopen.2024.4630), 2024-04-02
Supplement: jamanetwopen-e244630-s002.pdf [file jamanetwopen-e244630-s002.pdf]

## Data Sharing Statement

Yalamanchili. Quality of Large Language Model Responses to Radiation Oncology Patient Care Questions. *JAMA Netw Open*. Published April 02, 2024.  
doi:10.1001/jamanetworkopen.2024.4630

### Data

**Data available:** No
